# Supplementary material
Source: ML conference proceedings conference paper supplement (https://openaccess.thecvf.com/content/CVPR2024/html/Zheng_A_Unified_Approach_CVPR_2024_paper.html)
Supplement: Supplementary file 1 [file Zheng_A_Unified_Approach_CVPR_2024_supplemental.pdf]

# A Unified Approach for Text- and Image-guided 4D Scene Generation

Yufeng Zheng<sup>1,2,3</sup>, Xueting Li<sup>1</sup>, Koki Nagano<sup>1</sup>, Sifei Liu<sup>1</sup>, Otmar Hilliges<sup>2</sup>, Shalini De Mello<sup>1</sup>  
<sup>1</sup>NVIDIA, <sup>2</sup>ETH Zurich, <sup>3</sup>Max Planck Institute for Intelligent Systems

## 1. Societal impact

We note that our work could be potentially used to generate fake 4D content that is violent or harmful. Building upon pre-trained large-scale diffusion models, it inherits the biases and limitation of these models. Therefore, the 4D videos generated with our method should be carefully examined and labeled as synthetic content.

## 2. More Results

**Video results** Please refer to our web page (<https://research.nvidia.com/labs/nxp/dream-in-4d/>) for video results of the text-to-4D, image-to-4D and personalized 4D tasks. We also provide qualitative comparisons of our method and ablation baselines.

**More rendering angles** In Fig. 1, we show renderings from the top view and the bottom view. Our 4D assets produce plausible renderings from different elevation angles.

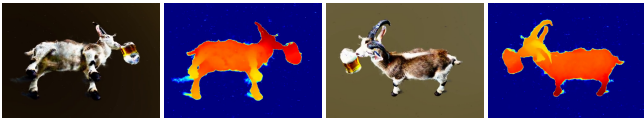

Figure 1. Renderings from different elevation angles.

## 3. Network Architecture

**Canonical NeRF.** We use a hash-encoded multi-resolution feature grid with 16 resolution levels, where the base resolution is  $16 \times 16 \times 16$  and maximum resolution is  $4096 \times 4096 \times 4096$ . The feature grid is followed by two shallow MLPs to produce the density and color values. Both of the MLP networks have 1 hidden layer and 64 neurons per layer.

**Deformation field.** The deformation field uses a hash-encoded multi-resolution feature grid with 12 levels, where the base resolution is  $4 \times 4 \times 4 \times 4$  and maximum resolution is  $232 \times 232 \times 232 \times 232$ . The feature grid is followed by an MLP with 4 hidden layers and 64 neurons per layer to predict the displacement values  $\mathbf{d}$  for scene deformation. We then calculate the canonical point location by  $\mathbf{x}_c = \mathbf{x}_d + \mathbf{d}$ .

| Prompts                                                   | $\lambda_{2D}$ | $\lambda_{3D}$ |
|-----------------------------------------------------------|----------------|----------------|
| A superhero dog wearing a red cape flying through the sky | 1.2            | 1              |
| A cat singing                                             | 1.2            | 1              |
| A dog riding a skateboard                                 | 1              | 1              |
| Clown fish swimming through coral reef                    | 1              | 1              |
| A fox playing a video game                                | 1.2            | 1              |
| A goat drinking beer                                      | 1              | 1              |
| A monkey eating a candy bar                               | 1              | 1              |
| An emoji of a baby panda reading a book                   | 1.2            | 1              |
| A baby panda eating ice cream                             | 1              | 1              |
| A squirrel riding a motorcycle                            | 1.2            | 1              |

Table 1. 2D and 3D guidance loss weights for the static stage.

**Background.** We model the background with an MLP, which takes the viewing direction as input and outputs a color value. This assumes that the background is located infinitely far away from the camera. The MLP has 3 hidden layers and 64 neurons per layer.

## 4. Training Schedule

### 4.1. Static Stage

For the static stage, we render multi-view images of resolution  $64 \times 64$  with a batch size of 8 for the first 5000 iterations, and resolution  $256 \times 256$  with a batch size of 4 for the last 5000 iterations. For MVDream [6] guidance, the images are upsampled to  $256 \times 256$ . For StableDiffusion [5], we upsample to  $512 \times 512$ . We use guidance scale of 50 for MVDream and 100 for StableDiffusion.

We use an AdamW [3] optimizer with a learning rate of 0.001 for all the MLP parameters and 0.01 for the parameters of hash-encoded multi-resolution feature grid. The  $\beta$  parameters are set to 0.9 and 0.99, respectively. We train the networks for 10000 iterations on a NVIDIA V100 GPU, which takes 4.5 hours.

We found that balancing the 3D and 2D guidance weights to be important for achieving view-consistent, text-aligned and realistic results. In Tab. 1, we list the loss weights used for all prompts in the paper.

## 4.2. Dynamic Stage

To learn deformation in the dynamic stage, we use guidance from the Zeroscope video diffusion model [2], where we render 24-frame videos of resolution  $144 \times 80$ . We found our method to also work well with guidance from the Modelscope video diffusion model [1], in which case we rendered videos of resolution  $64 \times 64$  for the first 7000 iterations and then upsample to  $256 \times 256$ . We use a guidance scale of 100 for both Zeroscope and Modelscope guidance, and gradually decrease the time step used for the SDS loss [4] from  $[0.99, 0.99]$  to  $[0.2, 0.5]$ .

In the dynamic stage, we optimize the deformation parameters with an AdamW [3] optimizer with learning a rate of 0.001 and  $\beta = [0.9, 0.99]$ . We train the deformation network for 10000 iterations on a NVIDIA A100 or RTX A6000 GPU. We start by using the first 4 levels of the multi-resolution features, and gradually include the higher resolution features, adding 1 level every 500 iterations. The dynamic stage takes 9 hours for Zeroscope, and 6 hours for Modelscope due to the lower inference resolution of the diffusion model.

## 5. User Study

In this section, we introduce more details of the user study. As discussed in Sec. 4.1 of the main paper, we compare against state-of-the-art method (MAV3D) and ablative baselines through a user preference study. Specifically, we present the results from our method and the baseline(s) to a user and give instructions to “Please find the method that best matched the prompt / has best motion / has best 3D consistency and visual quality.” The example interface is shown in Fig. 2.

## References

- [1] Modelscope. <https://huggingface.co/damo-vilab/text-to-video-ms-1.7b>. 2
- [2] Zeroscope. [https://huggingface.co/cerspense/zeroscope\\_v2\\_576w](https://huggingface.co/cerspense/zeroscope_v2_576w). 2
- [3] Ilya Loshchilov and Frank Hutter. Decoupled weight decay regularization. *arXiv preprint arXiv:1711.05101*, 2017. 1, 2
- [4] Ben Poole, Ajay Jain, Jonathan T Barron, and Ben Mildenhall. Dreamfusion: Text-to-3d using 2d diffusion. *arXiv preprint arXiv:2209.14988*, 2022. 2
- [5] Robin Rombach, Andreas Blattmann, Dominik Lorenz, Patrick Esser, and Björn Ommer. High-resolution image synthesis with latent diffusion models, 2021. 1
- [6] Yichun Shi, Peng Wang, Jianglong Ye, Long Mai, Kejie Li, and Xiao Yang. Mvdream: Multi-view diffusion for 3d generation. *arXiv:2308.16512*, 2023. 1

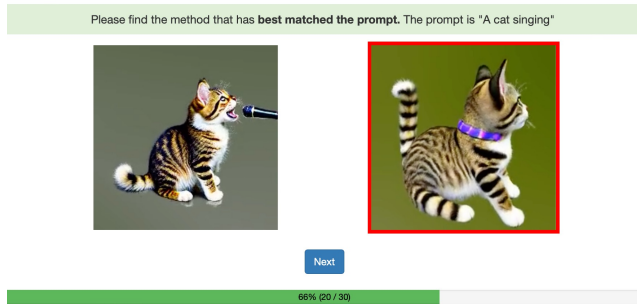

(a) Interface example corresponding to Table 1 (a) in the main paper.

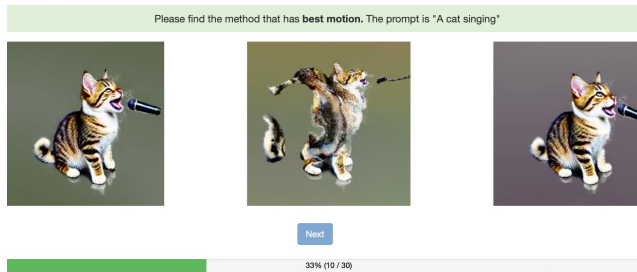

(b) Interface example corresponding to Table 1 (b) in the main paper.

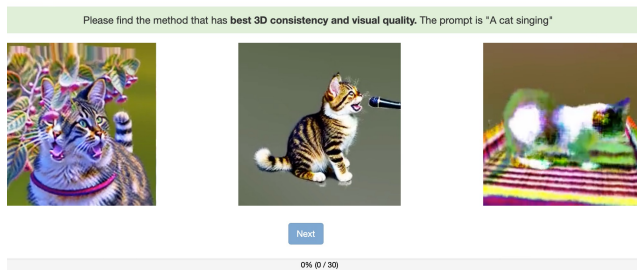

(c) Interface example corresponding to Table 1 (c) in the main paper.

Figure 2. User study interface.
